# Supplementary material for: HIV/AIDS health services in Manaus, Brazil: patient perception of quality and its influence on adherence to antiretroviral treatment
Source: Springer Nature journal article supplement (doi:10.1186/s12913-019-4062-9), 2019-05-30
Supplement: MOESM3 [file 16761064]

**Factors Associated with Highest Patient Satisfaction (Central Hospital and Decentralized Health Units)**

Weighted analysis using sampling weights to reflect the real distribution of patient population across health centers.

|                                                | Univariable Analysis<br>N=812  |        |         |       | Multivariable Analysis<br>N=803                                                        |        |         | Multivariable Analysis<br>N=810                                                                                                |        |         |      |      |       |       |     |
|------------------------------------------------|--------------------------------|--------|---------|-------|----------------------------------------------------------------------------------------|--------|---------|--------------------------------------------------------------------------------------------------------------------------------|--------|---------|------|------|-------|-------|-----|
|                                                | Analysis of individual factors |        |         |       | Full model including ALL patient characteristics and ALL health center characteristics |        |         | Final model including patient characteristics and health center characteristics that best explain highest patient satisfaction |        |         |      |      |       |       |     |
|                                                | Crude Odd Ratios               | 95% CI | p-value |       | Adjusted Odd Ratios                                                                    | 95% CI | p-value | Adjusted Odd Ratios                                                                                                            | 95% CI | p-value |      |      |       |       |     |
| <b>Patient's characteristics</b>               |                                |        |         |       |                                                                                        |        |         |                                                                                                                                |        |         |      |      |       |       |     |
| <b>Age group</b>                               |                                |        |         |       |                                                                                        |        |         |                                                                                                                                |        |         |      |      |       |       |     |
| 18-25 years old                                | 1                              |        |         |       | 1                                                                                      |        |         |                                                                                                                                |        |         |      |      |       |       |     |
| 26-35 years old                                | 1.03                           | 0.66   | 1.59    | 0.883 | 1.14                                                                                   | 0.44   | 2.92    | 0.689                                                                                                                          |        |         |      |      |       |       |     |
| 36-45 years old                                | 1.11                           | 0.78   | 1.58    | 0.489 | 1.42                                                                                   | 0.42   | 4.82    | 0.424                                                                                                                          |        |         |      |      |       |       |     |
| 46-55 years old                                | 1.12                           | 0.75   | 1.69    | 0.492 | 1.47                                                                                   | 0.48   | 4.49    | 0.354                                                                                                                          |        |         |      |      |       |       |     |
| More than 55 years old                         | 0.97                           | 0.94   | 1.01    | 0.102 | 1.34                                                                                   | 0.39   | 4.61    | 0.501                                                                                                                          |        |         |      |      |       |       |     |
| <b>Gender (1)</b>                              |                                |        |         |       |                                                                                        |        |         |                                                                                                                                |        |         |      |      |       |       |     |
| Women                                          | 1                              |        |         |       | 1                                                                                      |        |         |                                                                                                                                |        |         |      |      |       |       |     |
| Men                                            | 1.06                           | 0.91   | 1.23    | 0.319 | 0.74                                                                                   | 0.62   | 0.89    | 0.013                                                                                                                          | **     |         |      |      |       |       |     |
| <b>Education</b>                               |                                |        |         |       |                                                                                        |        |         |                                                                                                                                |        |         |      |      |       |       |     |
| Illiterate or incomplete primary education     | 1                              |        |         |       | 1                                                                                      |        |         |                                                                                                                                |        | 1       |      |      |       |       |     |
| Complete primary education                     | 1.90                           | 1.78   | 2.02    | 0.000 | ***                                                                                    | 1.57   | 0.68    | 3.60                                                                                                                           | 0.184  | 1.90    | 1.15 | 3.14 | 0.021 | **    |     |
| Complete secondary education                   | 1.54                           | 0.86   | 2.74    | 0.114 |                                                                                        | 1.17   | 0.55    | 2.53                                                                                                                           | 0.552  | 1.39    | 0.81 | 2.40 | 0.176 | **    |     |
| Complete tertiary education or higher          | 2.41                           | 0.95   | 6.09    | 0.059 | *                                                                                      | 1.68   | 0.94    | 2.99                                                                                                                           | 0.065  | *       | 2.16 | 0.95 | 4.91  | 0.061 | *   |
| <b>Race (2)</b>                                |                                |        |         |       |                                                                                        |        |         |                                                                                                                                |        |         |      |      |       |       |     |
| Black                                          | 1                              |        |         |       | 1                                                                                      |        |         |                                                                                                                                |        |         |      |      |       |       |     |
| Mulatto                                        | 1.33                           | 1.23   | 1.42    | 0.000 | ***                                                                                    | 0.91   | 0.54    | 1.52                                                                                                                           | 0.595  |         |      |      |       |       |     |
| White                                          | 1.17                           | 0.85   | 1.62    | 0.261 |                                                                                        | 0.66   | 0.40    | 1.10                                                                                                                           | 0.080  | *       |      |      |       |       |     |
| Asian                                          | 2.99                           | 1.06   | 8.46    | 0.043 | **                                                                                     | 1.88   | 0.98    | 3.59                                                                                                                           | 0.053  | *       |      |      |       |       |     |
| Indigenous                                     | 0.18                           | 0.03   | 0.90    | 0.041 | **                                                                                     | 0.12   | 0.00    | 6.69                                                                                                                           | 0.194  |         |      |      |       |       |     |
| <b>Sexual orientation (3)</b>                  |                                |        |         |       |                                                                                        |        |         |                                                                                                                                |        |         |      |      |       |       |     |
| Heterosexual                                   | 1                              |        |         |       | 1                                                                                      |        |         |                                                                                                                                |        |         |      |      |       |       |     |
| Homosexual                                     | 1.52                           | 1.02   | 2.25    | 0.042 | **                                                                                     | 1.56   | 1.21    | 2.01                                                                                                                           | 0.011  | **      |      |      |       |       |     |
| Bisexual                                       | 1.35                           | 0.79   | 2.32    | 0.213 |                                                                                        | 1.58   | 1.02    | 2.45                                                                                                                           | 0.045  | **      |      |      |       |       |     |
| <b>Monthly Income</b>                          |                                |        |         |       |                                                                                        |        |         |                                                                                                                                |        |         |      |      |       |       |     |
| No income                                      | 1                              |        |         |       | 1                                                                                      |        |         |                                                                                                                                |        |         |      |      |       |       |     |
| R\$500 or less                                 | 0.93                           | 0.58   | 1.50    | 0.721 |                                                                                        | 0.75   | 0.37    | 1.50                                                                                                                           | 0.275  |         |      |      |       |       |     |
| More than R\$ 500 and up to R\$ 1,000          | 0.75                           | 0.46   | 1.20    | 0.177 |                                                                                        | 0.76   | 0.43    | 1.36                                                                                                                           | 0.235  |         |      |      |       |       |     |
| More than R\$ 1,000 and up to R\$ 2,000        | 1.34                           | 0.56   | 3.19    | 0.425 |                                                                                        | 1.08   | 0.24    | 4.95                                                                                                                           | 0.876  |         |      |      |       |       |     |
| More than R\$ 2,000                            | 1.28                           | 0.63   | 2.62    | 0.414 |                                                                                        | 0.82   | 0.71    | 0.95                                                                                                                           | 0.023  | **      |      |      |       |       |     |
| <b>Place of residence</b>                      |                                |        |         |       |                                                                                        |        |         |                                                                                                                                |        |         |      |      |       |       |     |
| Manaus                                         | 1                              |        |         |       | 1                                                                                      |        |         |                                                                                                                                |        | 1       |      |      |       |       |     |
| Outside of Manaus                              | 1.09                           | 0.68   | 1.73    | 0.669 |                                                                                        | 2.06   | 1.84    | 2.30                                                                                                                           | 0.000  | ***     | 1.68 | 1.56 | 1.81  | 0.000 | *** |
| <b>Health center characteristics</b>           |                                |        |         |       |                                                                                        |        |         |                                                                                                                                |        |         |      |      |       |       |     |
| <b>Commute time to health center (4)</b>       |                                |        |         |       |                                                                                        |        |         |                                                                                                                                |        |         |      |      |       |       |     |
| Less than 30 minutes                           | 1                              |        |         |       | 1                                                                                      |        |         |                                                                                                                                |        |         |      |      |       |       |     |
| 30 minutes to 1 hour                           | 0.53                           | 0.28   | 0.99    | 0.048 | **                                                                                     | 0.65   | 0.25    | 1.69                                                                                                                           | 0.247  |         |      |      |       |       |     |
| More than 1 hour                               | 0.39                           | 0.16   | 0.94    | 0.040 | **                                                                                     | 0.60   | 0.21    | 1.69                                                                                                                           | 0.212  |         |      |      |       |       |     |
| <b>Convenience of health center's location</b> |                                |        |         |       |                                                                                        |        |         |                                                                                                                                |        |         |      |      |       |       |     |
| Inconvenient/Very inconvenient                 | 1                              |        |         |       | 1                                                                                      |        |         |                                                                                                                                |        | 1       |      |      |       |       |     |
| More or less                                   | 0.51                           | 0.29   | 0.90    | 0.029 | **                                                                                     | 0.43   | 0.31    | 0.59                                                                                                                           | 0.004  | ***     | 0.46 | 0.35 | 0.60  | 0.001 | *** |
| Convenient/Very convenient                     | 3.00                           | 2.44   | 3.69    | 0.000 | ***                                                                                    | 2.38   | 1.38    | 4.10                                                                                                                           | 0.015  | **      | 2.70 | 2.18 | 3.35  | 0.000 | *** |
| <b>Waiting time (5)</b>                        |                                |        |         |       |                                                                                        |        |         |                                                                                                                                |        |         |      |      |       |       |     |
| Less than 30 minutes                           | 1                              |        |         |       | 1                                                                                      |        |         |                                                                                                                                |        | 1       |      |      |       |       |     |
| 30 minutes to 1 hour                           | 0.52                           | 0.11   | 2.44    | 0.325 |                                                                                        | 0.68   | 0.08    | 6.18                                                                                                                           | 0.620  | 0.58    | 0.12 | 2.83 | 0.413 |       |     |
| 1-2 hours                                      | 0.42                           | 0.12   | 1.46    | 0.133 |                                                                                        | 0.65   | 0.09    | 4.75                                                                                                                           | 0.542  | 0.52    | 0.13 | 2.11 | 0.282 |       |     |
| 2-3 hours                                      | 0.33                           | 0.08   | 1.41    | 0.108 |                                                                                        | 0.49   | 0.05    | 4.68                                                                                                                           | 0.389  | 0.45    | 0.08 | 2.46 | 0.279 |       |     |
| More than 3 hours                              | 0.31                           | 0.26   | 0.37    | 0.000 | ***                                                                                    | 0.49   | 0.24    | 1.00                                                                                                                           | 0.050  | **      | 0.40 | 0.31 | 0.51  | 0.000 | *** |
| <b>Time to reschedule a missed appointment</b> |                                |        |         |       |                                                                                        |        |         |                                                                                                                                |        |         |      |      |       |       |     |
| A week (7 days) or less                        | 1                              |        |         |       | 1                                                                                      |        |         |                                                                                                                                |        |         |      |      |       |       |     |
| Between 1 week and 1 month (30 days)           | 0.52                           | 0.46   | 0.59    | 0.000 | ***                                                                                    | 0.80   | 0.56    | 1.15                                                                                                                           | 0.144  |         |      |      |       |       |     |
| More than 1 month                              | 0.52                           | 0.44   | 0.60    | 0.000 | ***                                                                                    | 0.83   | 0.34    | 2.05                                                                                                                           | 0.557  |         |      |      |       |       |     |
| <b>Respectful treatment from nurses</b>        |                                |        |         |       |                                                                                        |        |         |                                                                                                                                |        |         |      |      |       |       |     |
| No                                             | 1                              |        |         |       | 1                                                                                      |        |         |                                                                                                                                |        | 1       |      |      |       |       |     |
| Yes                                            | 1.47                           | 1.20   | 1.79    | 0.004 | ***                                                                                    | 1.40   | 0.99    | 1.97                                                                                                                           | 0.055  | *       | 1.50 | 1.03 | 2.20  | 0.040 | **  |
| <b>Respectful treatment from doctors</b>       |                                |        |         |       |                                                                                        |        |         |                                                                                                                                |        |         |      |      |       |       |     |
| No                                             | 1                              |        |         |       | 1                                                                                      |        |         |                                                                                                                                |        |         |      |      |       |       |     |
| Yes                                            | 4.74                           | 0.75   | 29.97   | 0.082 | *                                                                                      | 3.74   | 0.52    | 26.70                                                                                                                          | 0.123  |         |      |      |       |       |     |
| <b>Health Center</b>                           |                                |        |         |       |                                                                                        |        |         |                                                                                                                                |        |         |      |      |       |       |     |
| FMT                                            | 1                              |        |         |       | 1                                                                                      |        |         |                                                                                                                                |        | 1       |      |      |       |       |     |
| SAE 1                                          | 1.43                           | 0.69   | 2.97    | 0.264 |                                                                                        | 1.14   | 0.42    | 3.12                                                                                                                           | 0.706  | 1.20    | 0.64 | 2.25 | 0.485 |       |     |
| SAE 2                                          | 5.02                           | 2.47   | 10.21   | 0.002 | ***                                                                                    | 3.23   | 0.75    | 13.89                                                                                                                          | 0.083  | *       | 3.34 | 1.42 | 7.90  | 0.015 | **  |
| SAE 3                                          | 3.38                           | 3.02   | 3.79    | 0.000 | ***                                                                                    | 2.36   | 1.79    | 3.11                                                                                                                           | 0.002  | ***     | 2.52 | 2.24 | 2.85  | 0.000 | *** |
| SAE 4                                          | 1.85                           | 1.23   | 2.79    | 0.012 | **                                                                                     | 1.02   | 0.15    | 6.80                                                                                                                           | 0.973  |         | 1.03 | 0.41 | 2.59  | 0.941 |     |

\*\*\* p<0.01, \*\* p<0.05, \* p<0.1

- (1) 3 patients did not want to disclose their gender
- (2) 2 patients did not report their race
- (3) 1 patient did not disclose sexual orientation
- (4) 1 patient did not respond the question
- (5) 2 patients did not remember the wait time from last visit
