# Supplementary material for: HIV/AIDS health services in Manaus, Brazil: patient perception of quality and its influence on adherence to antiretroviral treatment
Source: Springer Nature journal article supplement (doi:10.1186/s12913-019-4062-9), 2019-05-30
Supplement: MOESM4 [file 16761064]

**Factors Associated with Highest Patient Satisfaction at Central Hospital**

|                                                | Univariable Analysis<br>N=410  |           |       |           | Multivariable Analysis<br>N=395                                                        |           |       |         | Multivariable Analysis<br>N=409                                                                                                |        |       |          |
|------------------------------------------------|--------------------------------|-----------|-------|-----------|----------------------------------------------------------------------------------------|-----------|-------|---------|--------------------------------------------------------------------------------------------------------------------------------|--------|-------|----------|
|                                                | Analysis of individual factors |           |       |           | Full model including ALL patient characteristics and ALL health center characteristics |           |       |         | Final model including patient characteristics and health center characteristics that best explain highest patient satisfaction |        |       |          |
|                                                | Crude Odd Ratios               | 95% CI    |       | p-value   | Adjusted Odd Ratios                                                                    | 95% CI    |       | p-value | Adjusted Odd Ratios                                                                                                            | 95% CI |       | p-value  |
| <b><i>Patient's characteristics</i></b>        |                                |           |       |           |                                                                                        |           |       |         |                                                                                                                                |        |       |          |
| <b>Age group</b>                               |                                |           |       |           |                                                                                        |           |       |         |                                                                                                                                |        |       |          |
| 18-25 years old                                | 1                              |           |       |           | 1                                                                                      |           |       |         |                                                                                                                                |        |       |          |
| 26-35 years old                                | 1.29                           | 0.50      | 3.32  | 0.592     | 1.69                                                                                   | 0.59      | 4.87  | 0.332   |                                                                                                                                |        |       |          |
| 36-45 years old                                | 1.57                           | 0.64      | 3.83  | 0.326     | 2.04                                                                                   | 0.72      | 5.78  | 0.179   |                                                                                                                                |        |       |          |
| 46-55 years old                                | 1.62                           | 0.61      | 4.28  | 0.334     | 2.27                                                                                   | 0.72      | 7.15  | 0.162   |                                                                                                                                |        |       |          |
| More than 55 years old                         | 1.41                           | 0.45      | 4.47  | 0.555     | 1.95                                                                                   | 0.48      | 7.93  | 0.350   |                                                                                                                                |        |       |          |
| <b>Gender (1)</b>                              |                                |           |       |           |                                                                                        |           |       |         |                                                                                                                                |        |       |          |
| Women                                          | 1                              |           |       |           | 1                                                                                      |           |       |         |                                                                                                                                |        |       |          |
| Men                                            | 0.91                           | 0.55      | 1.50  | 0.717     | 0.73                                                                                   | 0.38      | 1.41  | 0.344   |                                                                                                                                |        |       |          |
| <b>Education</b>                               |                                |           |       |           |                                                                                        |           |       |         |                                                                                                                                |        |       |          |
| Illiterate or incomplete primary education     | 1                              |           |       |           | 1                                                                                      |           |       |         |                                                                                                                                |        |       |          |
| Complete primary education                     | 1.89                           | 0.86      | 4.16  | 0.112     | 1.43                                                                                   | 0.58      | 3.54  | 0.435   |                                                                                                                                |        |       |          |
| Complete secondary education                   | 1.32                           | 0.69      | 2.55  | 0.405     | 0.97                                                                                   | 0.45      | 2.09  | 0.936   |                                                                                                                                |        |       |          |
| Complete tertiary education or higher          | 2.09                           | 0.91      | 4.84  | 0.084 *   | 1.50                                                                                   | 0.51      | 4.44  | 0.461   |                                                                                                                                |        |       |          |
| <b>Race</b>                                    |                                |           |       |           |                                                                                        |           |       |         |                                                                                                                                |        |       |          |
| Black                                          | 1                              |           |       |           | 1                                                                                      |           |       |         |                                                                                                                                |        |       |          |
| Mulatto                                        | 1.29                           | 0.43      | 3.92  | 0.648     | 0.79                                                                                   | 0.23      | 2.69  | 0.709   |                                                                                                                                |        |       |          |
| White                                          | 0.93                           | 0.25      | 3.46  | 0.914     | 0.50                                                                                   | 0.12      | 2.12  | 0.344   |                                                                                                                                |        |       |          |
| Asian                                          | 3.00                           | 0.50      | 17.95 | 0.229     | 1.55                                                                                   | 0.21      | 11.58 | 0.671   |                                                                                                                                |        |       |          |
| Indigenous                                     | 1                              | (omitted) |       |           | -                                                                                      | (omitted) |       |         |                                                                                                                                |        |       |          |
| <b>Sexual orientation (2)</b>                  |                                |           |       |           |                                                                                        |           |       |         |                                                                                                                                |        |       |          |
| Heterosexual                                   | 1                              |           |       |           | 1                                                                                      |           |       |         |                                                                                                                                |        |       |          |
| Homosexual                                     | 1.27                           | 0.70      | 2.30  | 0.426     | 1.41                                                                                   | 0.64      | 3.11  | 0.392   |                                                                                                                                |        |       |          |
| Bisexual                                       | 1.22                           | 0.53      | 2.81  | 0.645     | 1.78                                                                                   | 0.62      | 5.13  | 0.283   |                                                                                                                                |        |       |          |
| <b>Monthly income</b>                          |                                |           |       |           |                                                                                        |           |       |         |                                                                                                                                |        |       |          |
| No income                                      | 1                              |           |       |           | 1                                                                                      |           |       |         | 1                                                                                                                              |        |       |          |
| R\$500 or less                                 | 0.59                           | 0.19      | 1.89  | 0.377     | 0.95                                                                                   | 0.22      | 4.16  | 0.947   | 0.43                                                                                                                           | 0.13   | 1.44  | 0.169    |
| More than R\$ 500 and up to R\$ 1,000          | 0.66                           | 0.35      | 1.25  | 0.205     | 1.18                                                                                   | 0.40      | 3.46  | 0.761   | 0.54                                                                                                                           | 0.27   | 1.06  | 0.072 *  |
| More than R\$ 1,000 and up to R\$ 2,000        | 1.17                           | 0.60      | 2.30  | 0.649     | 1.73                                                                                   | 0.60      | 4.98  | 0.309   | 0.87                                                                                                                           | 0.42   | 1.82  | 0.719    |
| More than R\$ 2,000                            | 0.92                           | 0.37      | 2.27  | 0.857     | -                                                                                      | (omitted) |       |         | 0.59                                                                                                                           | 0.22   | 1.59  | 0.299    |
| <b>Place of residence</b>                      |                                |           |       |           |                                                                                        |           |       |         |                                                                                                                                |        |       |          |
| Manaus                                         | 1                              |           |       |           | 1                                                                                      |           |       |         | 1                                                                                                                              |        |       |          |
| Outside of Manaus                              | 1.23                           | 0.65      | 2.33  | 0.517     | 2.01                                                                                   | 0.93      | 4.37  | 0.078 * | 1.98                                                                                                                           | 0.96   | 4.09  | 0.064 *  |
| <b><i>Health center characteristics</i></b>    |                                |           |       |           |                                                                                        |           |       |         |                                                                                                                                |        |       |          |
| <b>Commute time to health center (3)</b>       |                                |           |       |           |                                                                                        |           |       |         |                                                                                                                                |        |       |          |
| Less than 30 minutes                           | 1                              |           |       |           | 1                                                                                      |           |       |         | 1                                                                                                                              |        |       |          |
| 30 minutes to 1 hour                           | 0.50                           | 0.26      | 0.96  | 0.038 **  | 0.55                                                                                   | 0.26      | 1.16  | 0.118   | 0.55                                                                                                                           | 0.28   | 1.12  | 0.099 *  |
| More than 1 hour                               | 0.42                           | 0.22      | 0.77  | 0.005 *** | 0.48                                                                                   | 0.23      | 1.02  | 0.056 * | 0.48                                                                                                                           | 0.23   | 0.98  | 0.044 ** |
| <b>Convenience of health center's location</b> |                                |           |       |           |                                                                                        |           |       |         |                                                                                                                                |        |       |          |
| Inconvenient/Very inconvenient                 | 1                              |           |       |           | 1                                                                                      |           |       |         | 1                                                                                                                              |        |       |          |
| More or less                                   | 0.45                           | 0.13      | 1.56  | 0.208     | 0.40                                                                                   | 0.11      | 1.46  | 0.164   | 0.44                                                                                                                           | 0.12   | 1.58  | 0.210    |
| Convenient/Very convenient                     | 2.58                           | 1.17      | 5.66  | 0.018 **  | 2.37                                                                                   | 1.00      | 5.61  | 0.050 * | 2.49                                                                                                                           | 1.07   | 5.77  | 0.034 ** |
| <b>Waiting time</b>                            |                                |           |       |           |                                                                                        |           |       |         |                                                                                                                                |        |       |          |
| Less than 30 minutes                           | 1                              |           |       |           | 1                                                                                      |           |       |         | 1                                                                                                                              |        |       |          |
| 30 minutes to 1 hour                           | 0.61                           | 0.25      | 1.48  | 0.276     | 0.89                                                                                   | 0.32      | 2.48  | 0.816   | 0.80                                                                                                                           | 0.30   | 2.13  | 0.651    |
| 1-2 hours                                      | 0.57                           | 0.23      | 1.39  | 0.215     | 0.90                                                                                   | 0.32      | 2.53  | 0.843   | 0.80                                                                                                                           | 0.30   | 2.13  | 0.650    |
| 2-3 hours                                      | 0.45                           | 0.18      | 1.16  | 0.098 *   | 0.59                                                                                   | 0.20      | 1.76  | 0.347   | 0.59                                                                                                                           | 0.21   | 1.66  | 0.318    |
| More than 3 hours                              | 0.46                           | 0.18      | 1.15  | 0.097 *   | 0.71                                                                                   | 0.25      | 2.06  | 0.531   | 0.65                                                                                                                           | 0.23   | 1.79  | 0.400    |
| <b>Time to reschedule a missed appointment</b> |                                |           |       |           |                                                                                        |           |       |         |                                                                                                                                |        |       |          |
| A week (7 days) or less                        | 1                              |           |       |           | 1                                                                                      |           |       |         |                                                                                                                                |        |       |          |
| Between 1 week and 1 month (30 days)           | 2.44                           | 0.29      | 20.18 | 0.408     | 1.85                                                                                   | 0.20      | 17.13 | 0.590   |                                                                                                                                |        |       |          |
| More than 1 month                              | 2.48                           | 0.31      | 19.75 | 0.391     | 1.84                                                                                   | 0.20      | 16.62 | 0.586   |                                                                                                                                |        |       |          |
| <b>Respectful treatment from nurses</b>        |                                |           |       |           |                                                                                        |           |       |         |                                                                                                                                |        |       |          |
| No                                             | 1                              |           |       |           | 1                                                                                      |           |       |         | 1                                                                                                                              |        |       |          |
| Yes                                            | 1.30                           | 0.70      | 2.40  | 0.409     | 1.29                                                                                   | 0.66      | 2.54  | 0.461   | 1.26                                                                                                                           | 0.66   | 2.43  | 0.483    |
| <b>Respectful treatment from doctors</b>       |                                |           |       |           |                                                                                        |           |       |         |                                                                                                                                |        |       |          |
| No                                             | 1                              |           |       |           | 1                                                                                      |           |       |         | 1                                                                                                                              |        |       |          |
| Yes                                            | 5.10                           | 0.67      | 38.56 | 0.115     | 4.60                                                                                   | 0.55      | 38.10 | 0.157   | 5.23                                                                                                                           | 0.66   | 41.67 | 0.118    |

\*\*\* p<0.01, \*\* p<0.05, \* p<0.1

- (1) 2 patients did not disclose gender
- (2) 1 patient did not disclose sexual orientation
- (3) 1 patient did not answer the question
