# Supplementary material for: HIV/AIDS health services in Manaus, Brazil: patient perception of quality and its influence on adherence to antiretroviral treatment
Source: Springer Nature journal article supplement (doi:10.1186/s12913-019-4062-9), 2019-05-30
Supplement: MOESM5 [file 16761064]

**Factors Associated with Highest Patient Satisfaction at Decentralized Health Units**

Weighted analysis using sampling weights to reflect the real distribution of patient population across SAEs

|                                                | Univariable Analysis<br>N=402  |        |       |         | Multivariable Analysis<br>N=397                                                        |        |       | Multivariable Analysis<br>N=400                                                                                                |                      |        |      |         |      |       |     |
|------------------------------------------------|--------------------------------|--------|-------|---------|----------------------------------------------------------------------------------------|--------|-------|--------------------------------------------------------------------------------------------------------------------------------|----------------------|--------|------|---------|------|-------|-----|
|                                                | Analysis of individual factors |        |       |         | Full model including ALL patient characteristics and ALL health center characteristics |        |       | Final model including patient characteristics and health center characteristics that best explain highest patient satisfaction |                      |        |      |         |      |       |     |
|                                                | Crude Odds Ratios              | 95% CI |       | p-value | Adjusted Odds Ratios                                                                   | 95% CI |       | p-value                                                                                                                        | Adjusted Odds Ratios | 95% CI |      | p-value |      |       |     |
| <b><u>Patient's characteristics</u></b>        |                                |        |       |         |                                                                                        |        |       |                                                                                                                                |                      |        |      |         |      |       |     |
| <b>Age group</b>                               |                                |        |       |         |                                                                                        |        |       |                                                                                                                                |                      |        |      |         |      |       |     |
| 18-25 years old                                | 1                              |        |       |         | 1                                                                                      |        |       |                                                                                                                                |                      |        |      |         |      |       |     |
| 26-35 years old                                | 0.89                           | 0.56   | 1.40  | 0.516   | 0.79                                                                                   | 0.74   | 0.83  | 0.001                                                                                                                          | ***                  |        |      |         |      |       |     |
| 36-45 years old                                | 1.07                           | 0.50   | 2.31  | 0.818   | 0.68                                                                                   | 0.43   | 1.08  | 0.077                                                                                                                          | *                    |        |      |         |      |       |     |
| 46-55 years old                                | 0.98                           | 0.56   | 1.71  | 0.928   | 1.24                                                                                   | 0.56   | 2.75  | 0.458                                                                                                                          |                      |        |      |         |      |       |     |
| More than 55 years old                         | 0.93                           | 0.30   | 2.86  | 0.872   | 1.71                                                                                   | 0.20   | 14.76 | 0.488                                                                                                                          |                      |        |      |         |      |       |     |
| <b>Gender (1)</b>                              |                                |        |       |         |                                                                                        |        |       |                                                                                                                                |                      |        |      |         |      |       |     |
| Women                                          | 1                              |        |       |         | 1                                                                                      |        |       |                                                                                                                                |                      |        |      |         |      |       |     |
| Men                                            | 1.71                           | 1.56   | 1.86  | 0.000   | ***                                                                                    | 0.62   | 0.47  | 0.83                                                                                                                           | 0.013                | **     |      |         |      |       |     |
| <b>Education</b>                               |                                |        |       |         |                                                                                        |        |       |                                                                                                                                |                      |        |      |         |      |       |     |
| Illiterate or incomplete primary education     | 1                              |        |       |         | 1                                                                                      |        |       |                                                                                                                                |                      | 1      |      |         |      |       |     |
| Complete primary education                     | 1.79                           | 1.74   | 1.84  | 0.000   | ***                                                                                    | 3.54   | 1.01  | 12.38                                                                                                                          | 0.049                | **     | 2.66 | 1.60    | 4.42 | 0.006 | *** |
| Complete secondary education                   | 2.50                           | 1.52   | 4.11  | 0.007   | ***                                                                                    | 3.06   | 1.37  | 6.81                                                                                                                           | 0.021                | **     | 2.41 | 1.24    | 4.69 | 0.021 | **  |
| Complete tertiary education or higher          | 3.71                           | 1.86   | 7.39  | 0.006   | ***                                                                                    | 2.27   | 1.41  | 3.65                                                                                                                           | 0.012                | **     | 2.13 | 1.22    | 3.69 | 0.019 | **  |
| <b>Race (2)</b>                                |                                |        |       |         |                                                                                        |        |       |                                                                                                                                |                      |        |      |         |      |       |     |
| Black                                          | 1                              |        |       |         | 1                                                                                      |        |       |                                                                                                                                |                      |        |      |         |      |       |     |
| Mulatto                                        | 1.42                           | 0.43   | 4.66  | 0.460   | 1.00                                                                                   | 0.40   | 2.52  | 0.998                                                                                                                          |                      |        |      |         |      |       |     |
| White                                          | 2.08                           | 0.47   | 9.21  | 0.245   | 1.08                                                                                   | 0.77   | 1.51  | 0.535                                                                                                                          |                      |        |      |         |      |       |     |
| Asian                                          | 4.30                           | 0.37   | 49.75 | 0.173   | 1.79                                                                                   | 0.47   | 6.75  | 0.258                                                                                                                          |                      |        |      |         |      |       |     |
| Indigenous                                     | 1.25                           | 0.89   | 1.75  | 0.138   | 0.50                                                                                   | 0.08   | 3.13  | 0.316                                                                                                                          |                      |        |      |         |      |       |     |
| <b>Sexual orientation</b>                      |                                |        |       |         |                                                                                        |        |       |                                                                                                                                |                      |        |      |         |      |       |     |
| Heterosexual                                   | 1                              |        |       |         | 1                                                                                      |        |       |                                                                                                                                |                      | 1      |      |         |      |       |     |
| Homosexual                                     | 1.96                           | 1.46   | 2.64  | 0.003   | ***                                                                                    | 2.96   | 1.53  | 5.75                                                                                                                           | 0.014                | **     | 2.26 | 1.56    | 3.26 | 0.004 | *** |
| Bisexual                                       | 1.38                           | 0.97   | 1.98  | 0.066   | *                                                                                      | 1.73   | 1.48  | 2.02                                                                                                                           | 0.001                | ***    | 1.23 | 0.83    | 1.81 | 0.215 |     |
| <b>Monthly income</b>                          |                                |        |       |         |                                                                                        |        |       |                                                                                                                                |                      |        |      |         |      |       |     |
| No income                                      | 1                              |        |       |         | 1                                                                                      |        |       |                                                                                                                                |                      | 1      |      |         |      |       |     |
| R\$500 or less                                 | 2.25                           | 1.45   | 3.50  | 0.007   | ***                                                                                    | 2.95   | 1.99  | 4.38                                                                                                                           | 0.003                | ***    | 2.52 | 1.64    | 3.87 | 0.004 | *** |
| More than R\$ 500 and up to R\$ 1,000          | 1.94                           | 1.54   | 2.44  | 0.001   | ***                                                                                    | 1.87   | 1.14  | 3.06                                                                                                                           | 0.028                | **     | 1.65 | 0.94    | 2.92 | 0.070 | *   |
| More than R\$ 1,000 and up to R\$ 2,000        | 2.63                           | 1.80   | 3.83  | 0.002   | ***                                                                                    | 2.64   | 1.89  | 3.67                                                                                                                           | 0.003                | ***    | 2.35 | 2.03    | 2.72 | 0.000 | *** |
| More than R\$ 2,000                            | 5.71                           | 5.37   | 6.08  | 0.000   | ***                                                                                    | 6.67   | 3.76  | 11.83                                                                                                                          | 0.002                | ***    | 5.52 | 3.70    | 8.26 | 0.000 | *** |
| <b>Place of residence</b>                      |                                |        |       |         |                                                                                        |        |       |                                                                                                                                |                      |        |      |         |      |       |     |
| Manaus                                         | 1                              |        |       |         | 1                                                                                      |        |       |                                                                                                                                |                      |        |      |         |      |       |     |
| Outside of Manaus                              | 1.32                           | 0.51   | 3.44  | 0.460   | 2.67                                                                                   | 1.10   | 6.48  | 0.038                                                                                                                          | **                   |        |      |         |      |       |     |
| <b><u>Health center characteristics</u></b>    |                                |        |       |         |                                                                                        |        |       |                                                                                                                                |                      |        |      |         |      |       |     |
| <b>Commute time to health center</b>           |                                |        |       |         |                                                                                        |        |       |                                                                                                                                |                      |        |      |         |      |       |     |
| Less than 30 minutes                           | 1                              |        |       |         | 1                                                                                      |        |       |                                                                                                                                |                      |        |      |         |      |       |     |
| 30 minutes to 1 hour                           | 0.70                           | 0.48   | 1.04  | 0.066   | *                                                                                      | 1.07   | 0.51  | 2.24                                                                                                                           | 0.791                |        |      |         |      |       |     |
| More than 1 hour                               | 0.45                           | 0.24   | 0.86  | 0.026   | **                                                                                     | 0.74   | 0.40  | 1.36                                                                                                                           | 0.212                |        |      |         |      |       |     |
| <b>Convenience of health center's location</b> |                                |        |       |         |                                                                                        |        |       |                                                                                                                                |                      |        |      |         |      |       |     |
| Inconvenient/Very inconvenient                 | 1                              |        |       |         | 1                                                                                      |        |       |                                                                                                                                |                      |        |      |         |      |       |     |
| More or less                                   | 1.86                           | 0.11   | 32.12 | 0.578   | 1.00                                                                                   | 0.07   | 15.02 | 0.997                                                                                                                          |                      |        |      |         |      |       |     |
| Convenient/Very convenient                     | 9.05                           | 3.18   | 25.78 | 0.004   | ***                                                                                    | 5.26   | 1.08  | 25.68                                                                                                                          | 0.045                | **     |      |         |      |       |     |
| <b>Waiting time (3)</b>                        |                                |        |       |         |                                                                                        |        |       |                                                                                                                                |                      |        |      |         |      |       |     |
| Less than 30 minutes                           | 1                              |        |       |         | 1                                                                                      |        |       |                                                                                                                                |                      | 1      |      |         |      |       |     |
| 30 minutes to 1 hour                           | 0.52                           | 0.31   | 0.86  | 0.022   | **                                                                                     | 0.51   | 0.23  | 1.10                                                                                                                           | 0.068                | *      | 0.51 | 0.29    | 0.92 | 0.033 | **  |
| 1-2 hours                                      | 0.30                           | 0.19   | 0.46  | 0.001   | ***                                                                                    | 0.23   | 0.10  | 0.53                                                                                                                           | 0.011                | **     | 0.24 | 0.18    | 0.32 | 0.000 | *** |
| 2-3 hours                                      | 0.33                           | 0.24   | 0.45  | 0.001   | ***                                                                                    | 0.29   | 0.15  | 0.59                                                                                                                           | 0.011                | **     | 0.32 | 0.21    | 0.50 | 0.002 | *** |
| More than 3 hours                              | 0.08                           | 0.06   | 0.12  | 0.000   | ***                                                                                    | 0.07   | 0.06  | 0.07                                                                                                                           | 0.000                | ***    | 0.08 | 0.05    | 0.12 | 0.000 | *** |
| <b>Time to reschedule a missed appointment</b> |                                |        |       |         |                                                                                        |        |       |                                                                                                                                |                      |        |      |         |      |       |     |
| A week (7 days) or less                        | 1                              |        |       |         | 1                                                                                      |        |       |                                                                                                                                |                      |        |      |         |      |       |     |
| Between 1 week and 1 month (30 days)           | 0.46                           | 0.29   | 0.75  | 0.012   | **                                                                                     | 0.49   | 0.46  | 0.52                                                                                                                           | 0.000                | ***    |      |         |      |       |     |
| More than 1 month                              | 0.70                           | 0.58   | 0.85  | 0.007   | ***                                                                                    | 0.60   | 0.17  | 2.08                                                                                                                           | 0.285                |        |      |         |      |       |     |
| <b>Respectful treatment from nurses</b>        |                                |        |       |         |                                                                                        |        |       |                                                                                                                                |                      |        |      |         |      |       |     |
| No                                             | 1                              |        |       |         | 1                                                                                      |        |       |                                                                                                                                |                      | 1      |      |         |      |       |     |
| Yes                                            | 1.73                           | 1.28   | 2.32  | 0.007   | ***                                                                                    | 3.18   | 0.92  | 10.95                                                                                                                          | 0.059                | *      | 3.64 | 2.48    | 5.35 | 0.001 | *** |
| <b>Respectful treatment from doctors</b>       |                                |        |       |         |                                                                                        |        |       |                                                                                                                                |                      |        |      |         |      |       |     |
| No                                             | 1                              |        |       |         | 1                                                                                      |        |       |                                                                                                                                |                      |        |      |         |      |       |     |
| Yes                                            | 2.00                           | 1.18   | 3.38  | 0.022   | **                                                                                     | 1.53   | 0.60  | 3.92                                                                                                                           | 0.244                |        |      |         |      |       |     |
| <b>SAE</b>                                     |                                |        |       |         |                                                                                        |        |       |                                                                                                                                |                      |        |      |         |      |       |     |
| SAE 1                                          | 1                              |        |       |         | 1                                                                                      |        |       |                                                                                                                                |                      | 1      |      |         |      |       |     |
| SAE 2                                          | 3.51                           | 3.19   | 3.87  | 0.000   | ***                                                                                    | 1.98   | 1.31  | 2.99                                                                                                                           | 0.014                | **     | 2.48 | 1.84    | 3.33 | 0.001 | *** |
| SAE 3                                          | 2.37                           | 1.19   | 4.70  | 0.025   | **                                                                                     | 1.20   | 0.80  | 1.79                                                                                                                           | 0.247                |        | 1.60 | 0.96    | 2.67 | 0.063 | *   |
| SAE 4                                          | 1.29                           | 0.91   | 1.85  | 0.115   |                                                                                        | 0.30   | 0.27  | 0.33                                                                                                                           | 0.000                | ***    | 0.53 | 0.46    | 0.60 | 0.000 | *** |

\*\*\* p<0.01, \*\* p<0.05, \* p<0.1

(1) 1 patient did not disclose gender

(2) 2 patients did not report race

(3) 2 patients did not remember the waiting time from last visit
