# Supplementary material for: HIV/AIDS health services in Manaus, Brazil: patient perception of quality and its influence on adherence to antiretroviral treatment
Source: Springer Nature journal article supplement (doi:10.1186/s12913-019-4062-9), 2019-05-30
Supplement: MOESM6 [file 16761064]

| Effect of Patient Satisfaction on Adherence to ART<br>(Central Hospital and Decentralized Health Units) | Univariable Analysis<br>N=502 (A) |            |         |    | Multivariable Analysis<br>Effect of Overall Satisfaction<br>N=499                              |            |         |     |  |
|---------------------------------------------------------------------------------------------------------|-----------------------------------|------------|---------|----|------------------------------------------------------------------------------------------------|------------|---------|-----|--|
|                                                                                                         | Analysis of individual factors    |            |         |    | Multi-level model including all patient and health center characteristics as control variables |            |         |     |  |
|                                                                                                         | Crude Odds Ratios                 | 95% CI     | p-value |    | Adjusted Odds Ratios                                                                           | 95% CI     | p-value |     |  |
| <b>Overall Satisfaction with health center (A)</b>                                                      |                                   |            |         |    |                                                                                                |            |         |     |  |
| Very satisfied                                                                                          | 1.83                              | 1.02 3.29  | 0.042   | ** | 1.99                                                                                           | 1.02 3.89  | 0.043   | **  |  |
| Otherwise                                                                                               | 1                                 |            |         |    | 1                                                                                              |            |         |     |  |
| <b><u>Patient's characteristics</u></b>                                                                 |                                   |            |         |    |                                                                                                |            |         |     |  |
| <b>Age group</b>                                                                                        |                                   |            |         |    |                                                                                                |            |         |     |  |
| 18-25 years old                                                                                         | 1                                 |            |         |    | 1                                                                                              |            |         |     |  |
| 26-35 years old                                                                                         | 1.42                              | 0.72 2.77  | 0.309   |    | 2.02                                                                                           | 0.93 4.35  | 0.074   | *   |  |
| 36-45 years old                                                                                         | 1.70                              | 0.86 3.34  | 0.125   |    | 3.28                                                                                           | 1.39 7.73  | 0.007   | *** |  |
| 46-55 years old                                                                                         | 3.18                              | 1.29 7.86  | 0.012   | ** | 5.69                                                                                           | 1.95 16.62 | 0.001   | *** |  |
| More than 55 years old                                                                                  | 5.77                              | 1.26 26.48 | 0.024   | ** | 11.91                                                                                          | 2.07 68.50 | 0.006   | *** |  |
| <b>Gender (1)</b>                                                                                       |                                   |            |         |    |                                                                                                |            |         |     |  |
| Women                                                                                                   | 1                                 |            |         |    | 1                                                                                              |            |         |     |  |
| Men                                                                                                     | 1.17                              | 0.73 1.89  | 0.513   |    | 0.82                                                                                           | 0.44 1.53  | 0.537   |     |  |
| <b>Education</b>                                                                                        |                                   |            |         |    |                                                                                                |            |         |     |  |
| Primary education or less                                                                               | 1                                 |            |         |    | 1                                                                                              |            |         |     |  |
| Secondary education or higher                                                                           | 1.09                              | 0.67 1.76  | 0.734   |    | 0.90                                                                                           | 0.51 1.60  | 0.729   |     |  |
| <b>Race (2)</b>                                                                                         |                                   |            |         |    |                                                                                                |            |         |     |  |
| Black                                                                                                   | 1                                 |            |         |    | 1                                                                                              |            |         |     |  |
| Mulatto                                                                                                 | 1.05                              | 0.39 2.86  | 0.923   |    | 1.02                                                                                           | 0.34 3.00  | 0.977   |     |  |
| White                                                                                                   | 1.86                              | 0.54 6.47  | 0.327   |    | 1.82                                                                                           | 0.47 6.94  | 0.383   |     |  |
| Asian                                                                                                   | 0.65                              | 0.10 4.23  | 0.654   |    | 0.89                                                                                           | 0.12 6.79  | 0.907   |     |  |
| Indigenous                                                                                              | 0.49                              | 0.11 2.25  | 0.358   |    | 0.49                                                                                           | 0.09 2.63  | 0.404   |     |  |
| <b>Sexual orientation</b>                                                                               |                                   |            |         |    |                                                                                                |            |         |     |  |
| Heterosexual                                                                                            | 1                                 |            |         |    | 1                                                                                              |            |         |     |  |
| Otherwise                                                                                               | 1.45                              | 0.86 2.46  | 0.167   |    | 1.99                                                                                           | 0.97 4.08  | 0.061   | *   |  |
| <b>Employment</b>                                                                                       |                                   |            |         |    |                                                                                                |            |         |     |  |
| Employed                                                                                                | 1                                 |            |         |    | 1                                                                                              |            |         |     |  |
| Self-employed                                                                                           | 1.01                              | 0.47 2.17  | 0.986   |    | 0.85                                                                                           | 0.35 2.11  | 0.732   |     |  |
| Unemployed without income                                                                               | 0.50                              | 0.28 0.89  | 0.020   | ** | 0.63                                                                                           | 0.22 1.87  | 0.409   |     |  |
| Unemployed with financial support                                                                       | 0.53                              | 0.26 1.07  | 0.076   | *  | 0.69                                                                                           | 0.29 1.64  | 0.396   |     |  |
| Retired                                                                                                 | 2.69                              | 0.61 11.93 | 0.192   |    | 2.30                                                                                           | 0.45 11.84 | 0.318   |     |  |
| <b>Monthly income</b>                                                                                   |                                   |            |         |    |                                                                                                |            |         |     |  |
| No income                                                                                               | 1                                 |            |         |    | 1                                                                                              |            |         |     |  |
| R\$500 or less                                                                                          | 2.43                              | 0.95 6.22  | 0.064   | *  | 1.71                                                                                           | 0.42 6.94  | 0.451   |     |  |
| More than R\$ 500 and up to R\$ 1,000                                                                   | 1.41                              | 0.79 2.50  | 0.245   |    | 0.78                                                                                           | 0.26 2.32  | 0.652   |     |  |
| More than R\$ 1,000 and up to R\$ 2,000                                                                 | 2.36                              | 1.17 4.78  | 0.017   | ** | 1.30                                                                                           | 0.44 3.90  | 0.634   |     |  |
| More than R\$ 2,000                                                                                     | 2.33                              | 0.91 5.97  | 0.079   | *  | (omitted)                                                                                      |            |         |     |  |
| <b>Place of residence</b>                                                                               |                                   |            |         |    |                                                                                                |            |         |     |  |
| Manaus                                                                                                  | 1                                 |            |         |    | 1                                                                                              |            |         |     |  |
| Outside of Manaus                                                                                       | 0.92                              | 0.46 1.85  | 0.82    |    | 1.04                                                                                           | 0.45 2.42  | 0.926   |     |  |
| <b><u>Health center characteristics</u></b>                                                             |                                   |            |         |    |                                                                                                |            |         |     |  |
| <b>Commute time to health center (3)</b>                                                                |                                   |            |         |    |                                                                                                |            |         |     |  |
| Less than 30 minutes                                                                                    | 1                                 |            |         |    | 1                                                                                              |            |         |     |  |
| 30 minutes to 1 hour                                                                                    | 0.88                              | 0.48 1.64  | 0.693   |    | 0.90                                                                                           | 0.45 1.80  | 0.771   |     |  |
| More than 1 hour                                                                                        | 0.90                              | 0.49 1.65  | 0.743   |    | 1.00                                                                                           | 0.48 2.08  | 0.990   |     |  |
| <b>Convenience of health center's location</b>                                                          |                                   |            |         |    |                                                                                                |            |         |     |  |
| Inconvenient/Very inconvenient                                                                          | 1                                 |            |         |    | 1                                                                                              |            |         |     |  |
| More or less                                                                                            | 1.27                              | 0.47 3.43  | 0.644   |    | 1.33                                                                                           | 0.45 3.93  | 0.611   |     |  |
| Convenient/Very convenient                                                                              | 0.85                              | 0.40 1.82  | 0.684   |    | 0.55                                                                                           | 0.23 1.32  | 0.182   |     |  |
| <b>Waiting time</b>                                                                                     |                                   |            |         |    |                                                                                                |            |         |     |  |
| Less than 30 minutes                                                                                    | 1                                 |            |         |    | 1                                                                                              |            |         |     |  |
| 30 minutes to 1 hour                                                                                    | 1.33                              | 0.62 2.85  | 0.458   |    | 1.76                                                                                           | 0.75 4.16  | 0.195   |     |  |
| 1-3 hours                                                                                               | 1.02                              | 0.49 2.11  | 0.964   |    | 1.63                                                                                           | 0.70 3.82  | 0.257   |     |  |
| More than 3 hours                                                                                       | 1.02                              | 0.44 2.36  | 0.959   |    | 1.77                                                                                           | 0.67 4.67  | 0.251   |     |  |
| <b>Time to reschedule a missed appointment</b>                                                          |                                   |            |         |    |                                                                                                |            |         |     |  |
| A week (7 days) or less                                                                                 | 1                                 |            |         |    | 1                                                                                              |            |         |     |  |
| Between 1 week and 1 month (30 days)                                                                    | 0.51                              | 0.24 1.11  | 0.091   | *  | 0.64                                                                                           | 0.26 1.58  | 0.337   |     |  |
| More than 1 month                                                                                       | 0.77                              | 0.37 1.62  | 0.491   |    | 1.40                                                                                           | 0.53 3.74  | 0.499   |     |  |
| <b>Respectful treatment from health professionals</b>                                                   |                                   |            |         |    |                                                                                                |            |         |     |  |
| No                                                                                                      | 1                                 |            |         |    | 1                                                                                              |            |         |     |  |
| Yes                                                                                                     | 1.46                              | 0.85 2.49  | 0.169   |    | 1.30                                                                                           | 0.71 2.38  | 0.397   |     |  |
| <b>Health Center</b>                                                                                    |                                   |            |         |    |                                                                                                |            |         |     |  |
| FMT                                                                                                     | 1                                 |            |         |    | 1                                                                                              |            |         |     |  |
| SAEs                                                                                                    | 1.77                              | 1.07 2.92  | 0.025   | ** | 0.26                                                                                           | 0.02 3.22  |         |     |  |

\*\*\* p<0.01, \*\* p<0.05, \* p<0.1

Multi-variate model: LR test vs. logistic model: chibar2(01) = 4.12 Prob >= chibar2 = 0.0212

(A) There was information on last viral load test for 502 patients who had been exposed to ART for at least one year

(1) 1 patient did not disclose gender

(2) 1 patient did not report race

(3) 1 patient did not respond the question
